# Supplementary material for: Eliciting a single amino acid change by vaccination generates antibody protection against group 1 and group 2 influenza A viruses
Source: PubMed Central journal article supplement (PMC11096021; doi:10.1016/j.immuni.2024.03.022), 2024-04-25
Supplement: NIHMS1984324-supplement-1.pdf [file NIHMS1984324-supplement-1.pdf]

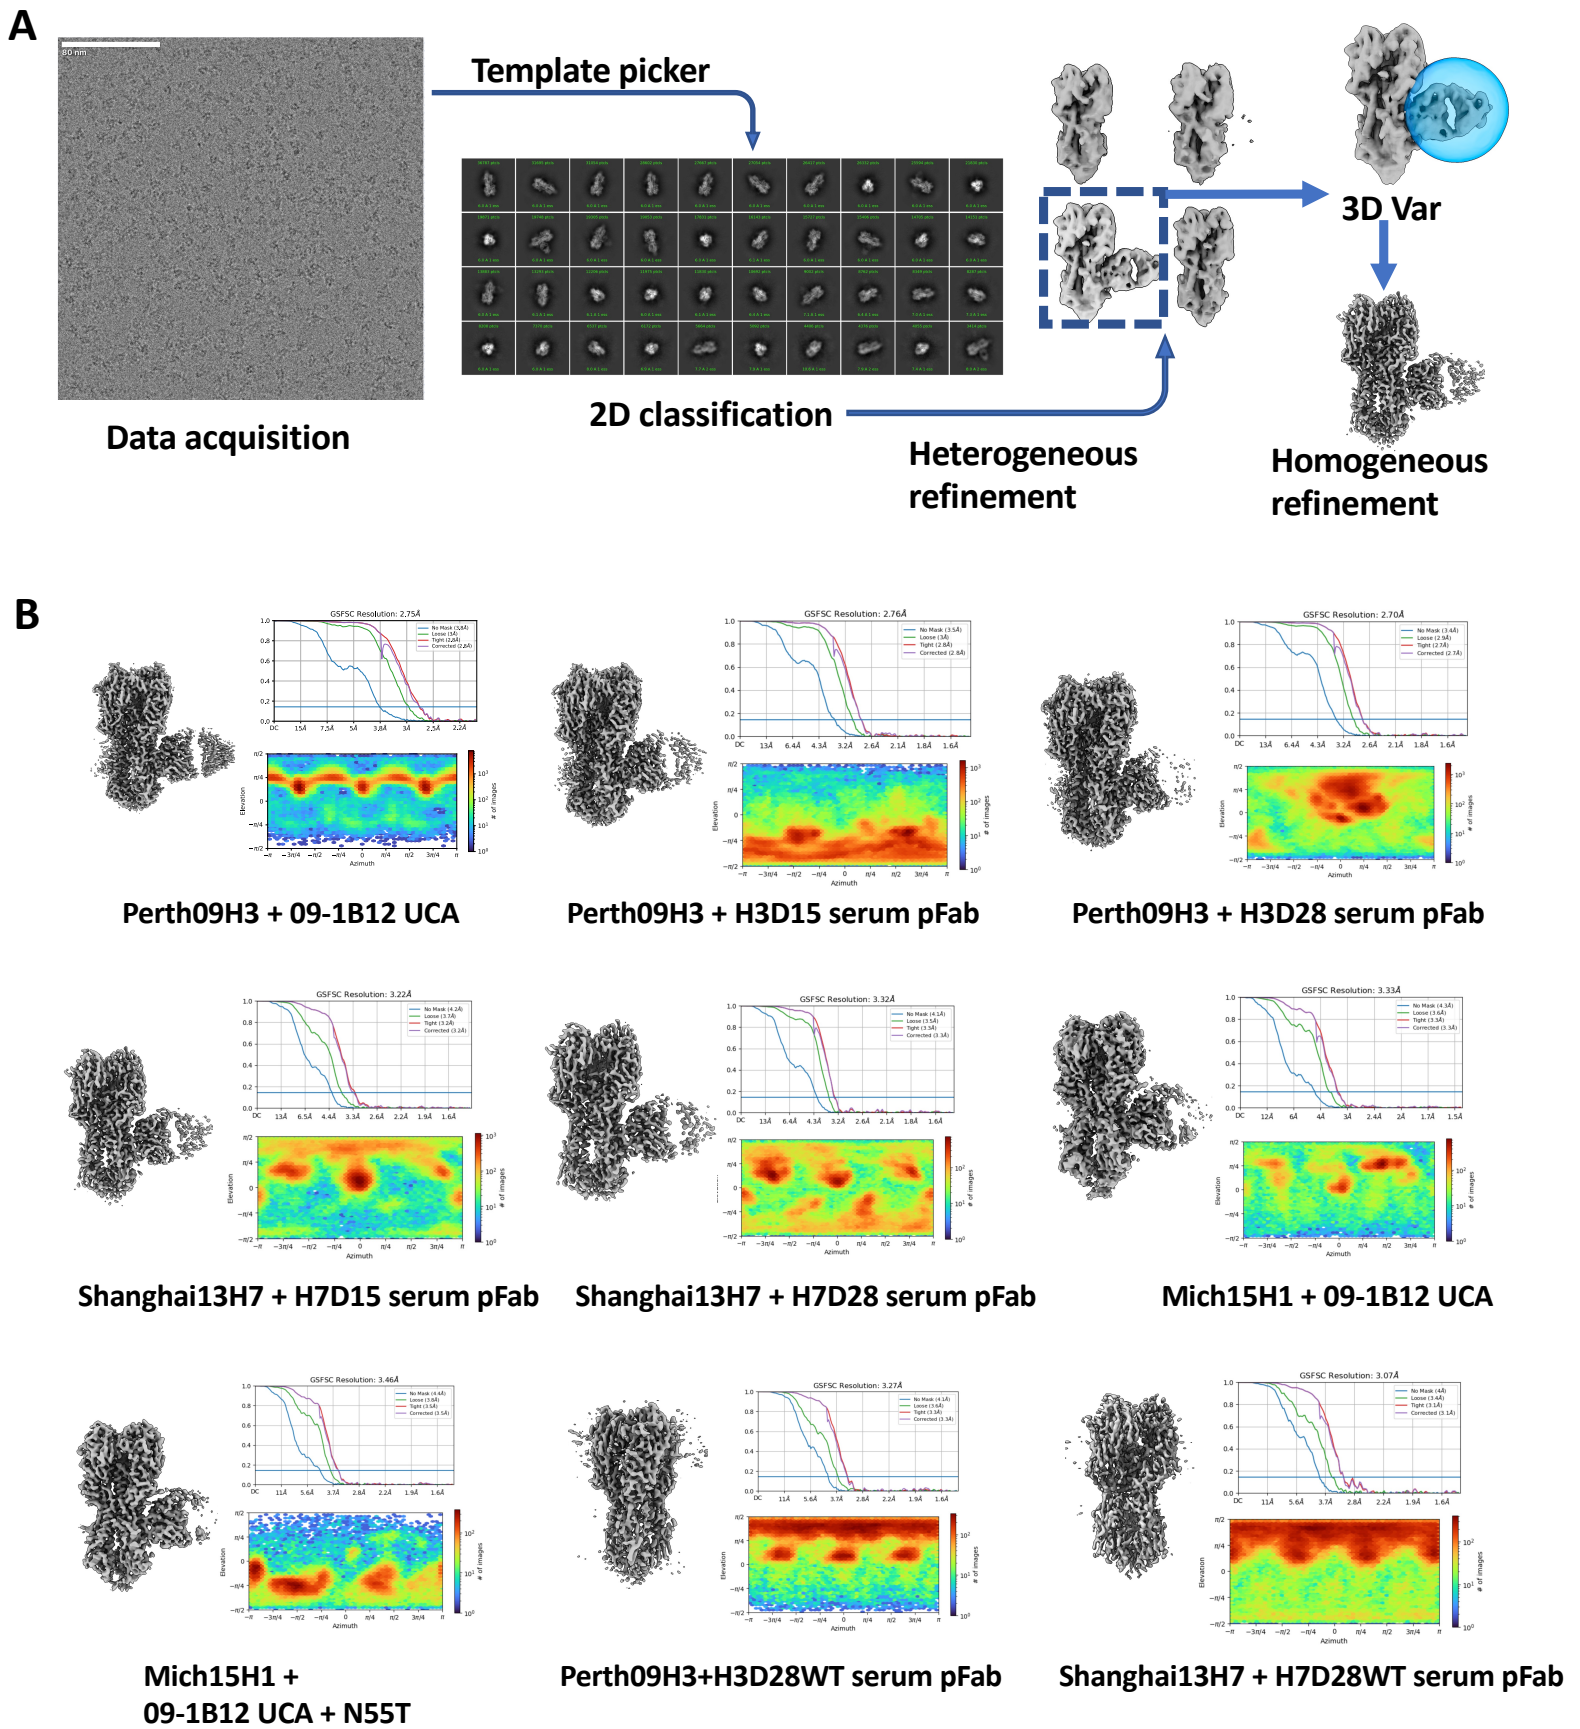

**Figure S1. CryoEM data processing and model reconstruction (related to Figure 1B,C, 5D,E,G-I, 6A-F).** (A) A general workflow of data processing for HA complexed with monoclonal or polyclonal Fabs. (B) Fourier Shell Correlation and angular sampling for cryoEM maps in this manuscript.

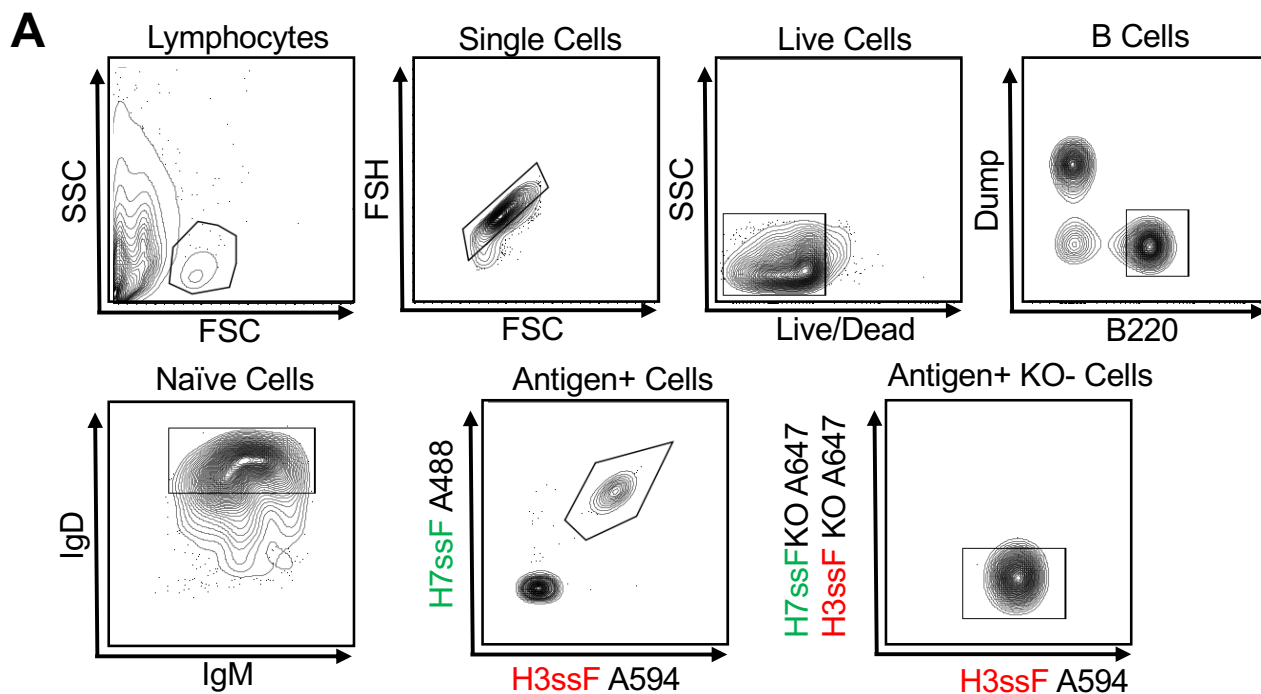

**B**

|                     | % of B220+ cells |
|---------------------|------------------|
| IGHV - 09-1B12-UCA  | 38.14            |
| IGHK - 09-1B12-UCA  | 38.56            |
| paired              | 11.02            |
| IGLV1 - 09-1B12-UCA | 17.8             |
| IGLV2 - 09-1B12-UCA | 3.81             |
| IGLV3 - 09-1B12-UCA | 1.69             |

**C**

|                     | % H3+/H7+ cells |
|---------------------|-----------------|
| IGHV - 09-1B12-UCA  | 99.19           |
| IGHK - 09-1B12-UCA  | 83.47           |
| paired              | 83.47           |
| IGLV1 - 09-1B12-UCA | 0.4             |
| IGLV2 - 09-1B12-UCA | 0.4             |
| IGLV3 - 09-1B12-UCA | 0               |

**Figure S2. 09-1B12-UCA B cell frequency and antigenicity in the KI mice ( $H^{09-1B12-UCA/WT}$ ,  $\kappa^{09-1B12-UCA/WT}$ ) (Related to Figure 2A-D).** (A) Flow cytometry gating strategy for sorting and sequencing naïve B cells from 09-1B12-UCA KI mice generated with CRISPR-Cas9. (B) Table showing frequency (%) of amplified human 09-1B12-UCA heavy chain (IGHV), human 09-1B12-UCA light chain (IGKV) and paired human heavy and light chain KI sequences from 10x sequencing of naïve B cells and antigen<sup>+</sup> B cells (H3ssF<sup>+</sup>/H7ssF<sup>+</sup>/H3ssF-KO<sup>-</sup>/H7ssF-KO<sup>-</sup>, central stem epitope KO=N-linked glycan at 45<sub>HA2</sub>) in 09-1B12-UCA KI mice (one experiment).

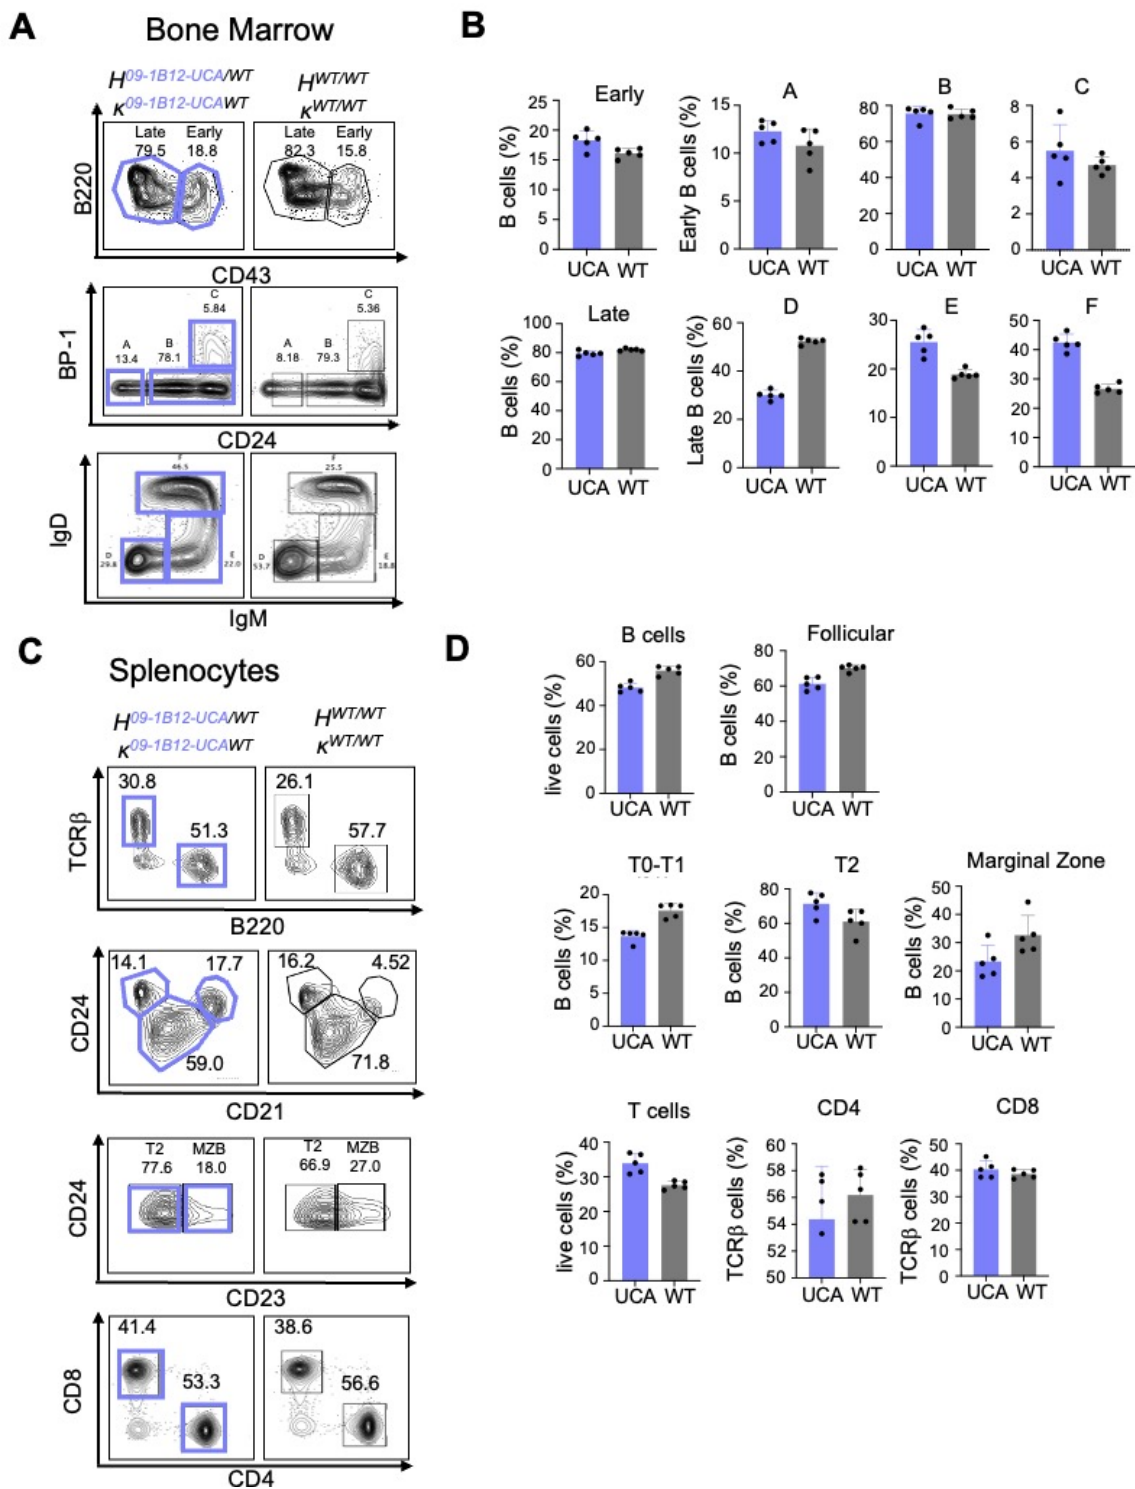

**Figure S3. B cell development within the bone marrow and spleen of 09-1B12-UCA KI mice ( $H^{09-1B12-UCA/WT}$ ,  $\kappa^{09-1B12-UCA/WT}$ ) (related to Figure 2A-D).** (A) Representative flow cytometry of bone marrow progenitors isolated from 8–10-week-old  $H^{09-1B12-UCA/WT}$ ,  $\kappa^{09-1B12-UCA/WT}$  and WT mice, separated by Hardy classification into early ( $B220^+/CD43^+$ ) and late ( $B220^+/CD43^-$ ) B cells (top panel). Middle and bottom panels show early ( $BP-1^+/CD24^+$ ) B cell subfractions and late ( $IgD^+/IgM^+$ ) subfractions respectively in the bone marrow. (B) Quantification of early and late B cell fractions in bone marrow of  $H^{09-1B12-UCA/WT}$ ,  $\kappa^{09-1B12-UCA/WT}$  and WT mice from (A) ( $n=5$  mice per genotype, mean  $\pm$  SD, one experiment). (C) Representative flow cytometry of splenocytes isolated from 8–10-week-old  $H^{09-1B12-UCA/WT}$ ,  $\kappa^{09-1B12-UCA/WT}$  and WT mice and gating strategy applied for the quantification of splenic B cells and their differentiation into Follicular, Transitional (T0, T1, T2) and Marginal Zone B cells. Bottom plots show CD4 and CD8 T cells in spleens of 09-1B12-UCA KI and WT mice. (D) Quantification of B and T cells and different fractions of B cells from sample in (C) ( $n=5$  mice per genotype, mean  $\pm$  SD, one experiment).

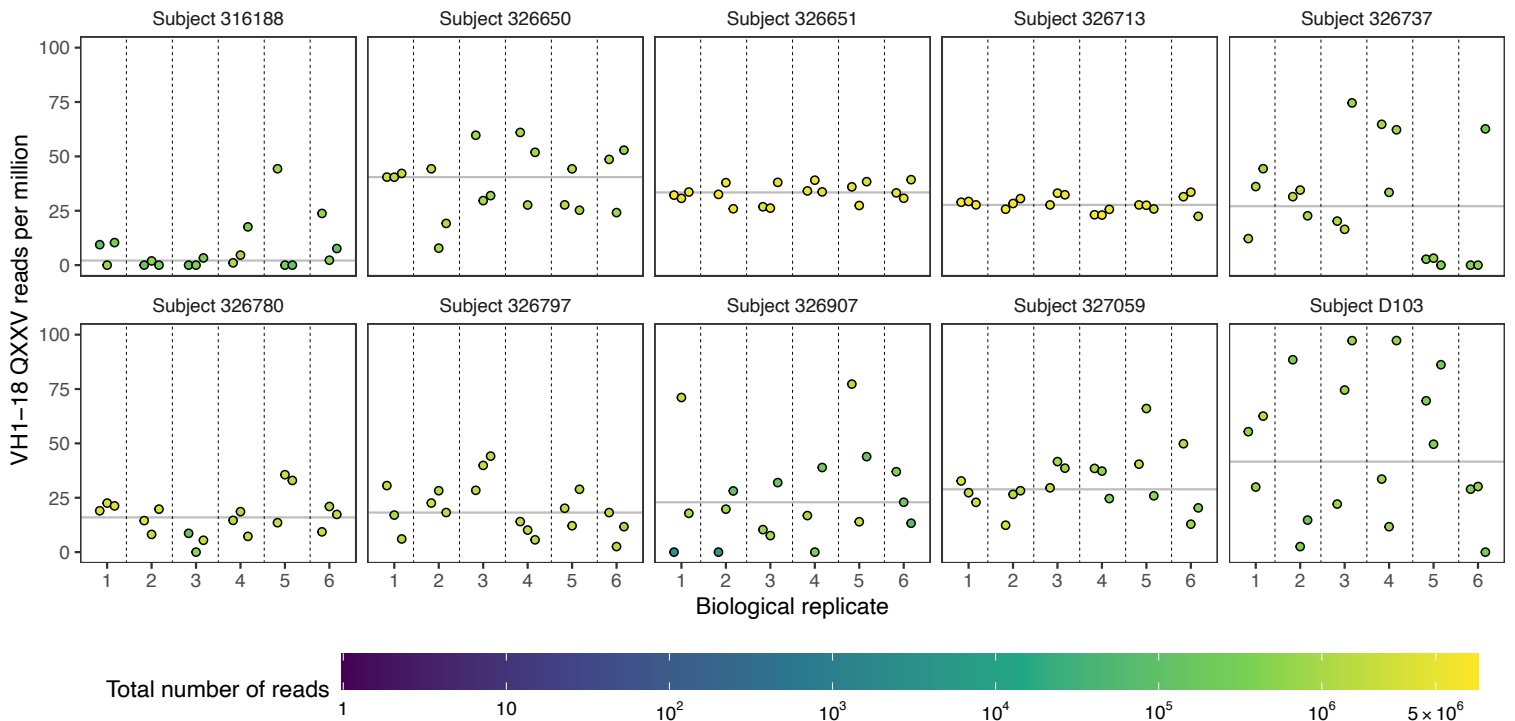

**Figure S4. VH1-18 QxxV class bnAb precursors frequency in humans (related to Figure 2E).** (A) Frequencies of the bnAb precursors within deep sequenced human IgM antibody repertoires (n=10 subjects with six biological replicates per subject and three technical replicates (three points shown) per biological replicate (1-6 on x-axis) (Briney *et al.*, 2019). The median frequency, excluding replicates with fewer than 100,000 total reads, is shown by the gray line (median = 27.4 per million reads with interquartile range = 22.1 per million reads).

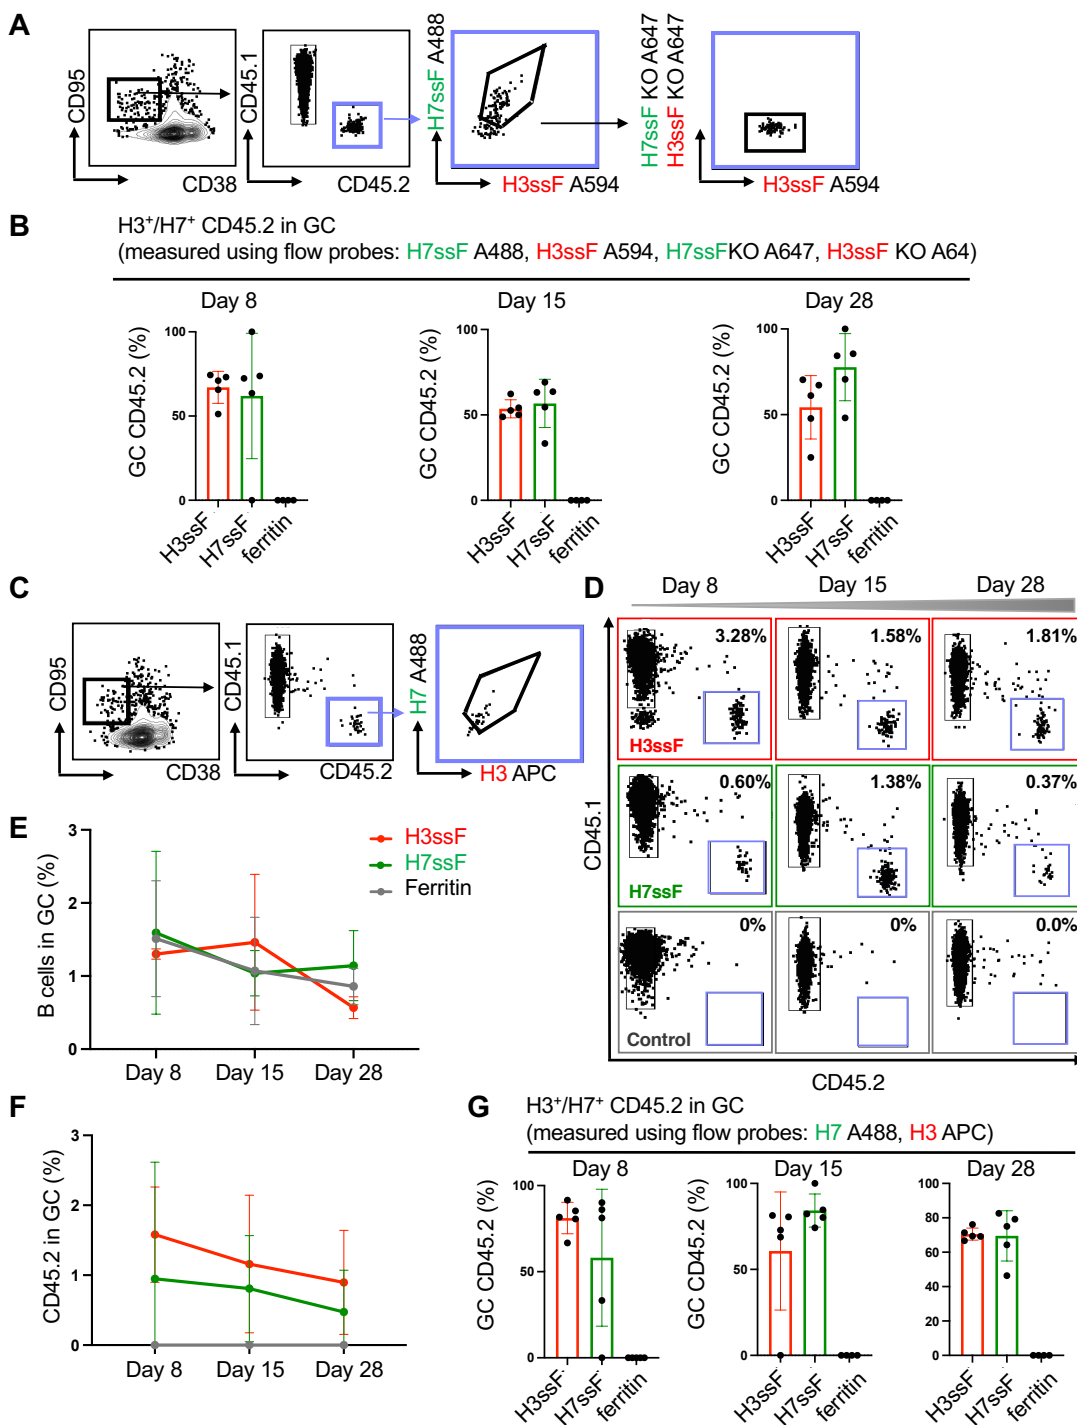

**Figure S5. Flow cytometry on germinal center reactions following single immunization with H3ssF, H7ssF or ferritin alone (related to Figure 3A-E).** (A) Representative flow cytometry gating for germinal center responses when HA nanoparticle probes are deployed to detect epitope specificity (H3ssF-A594, H7ssF-A488, H7ssF-KO-A647 + H3ssF-KO-A647; central stem epitope KO=N-linked glycan at 45<sub>HA2</sub>). (B) Percentage of H3ssF<sup>+</sup>/H7ssF<sup>+</sup>/ H3ssF-KO<sup>-</sup>/H7ssF-KO<sup>-</sup> reactive CD45.2 B cells that are within the GCs at Days 8, 15, and 28 post immunization with H3ssF, H7ssF or ferritin control (n=5 mice per immunization regimen). (C-G) Germinal center responses when H3 trimer and H7 trimer probes (instead of nanoparticle probes) are deployed to detect epitope specificity. (C) Representative flow cytometry gating for H7<sup>+</sup>/H3<sup>+</sup> cross-reactivity. (D) Representative flow plots of CD45.2 B cells being recruited to GCs at days 8, 15, and 28 post-vaccination. (E) The percentage of GC B cells in the CD45.1 host was quantified at each time point (n=5 mice per group, mean ± SD). (F) The percentage of CD45.2 B cells within the host GCs each time point (n=5 mice per group, mean ± SD). (G) Percentage of H3<sup>+</sup>/H7<sup>+</sup> cross-reactive CD45.2 B cells that are within the GCs at Days 8, 15, and 28 post immunization with H3ssF, H7ssF or ferritin control (n=5 mice per immunogen, one experiment).

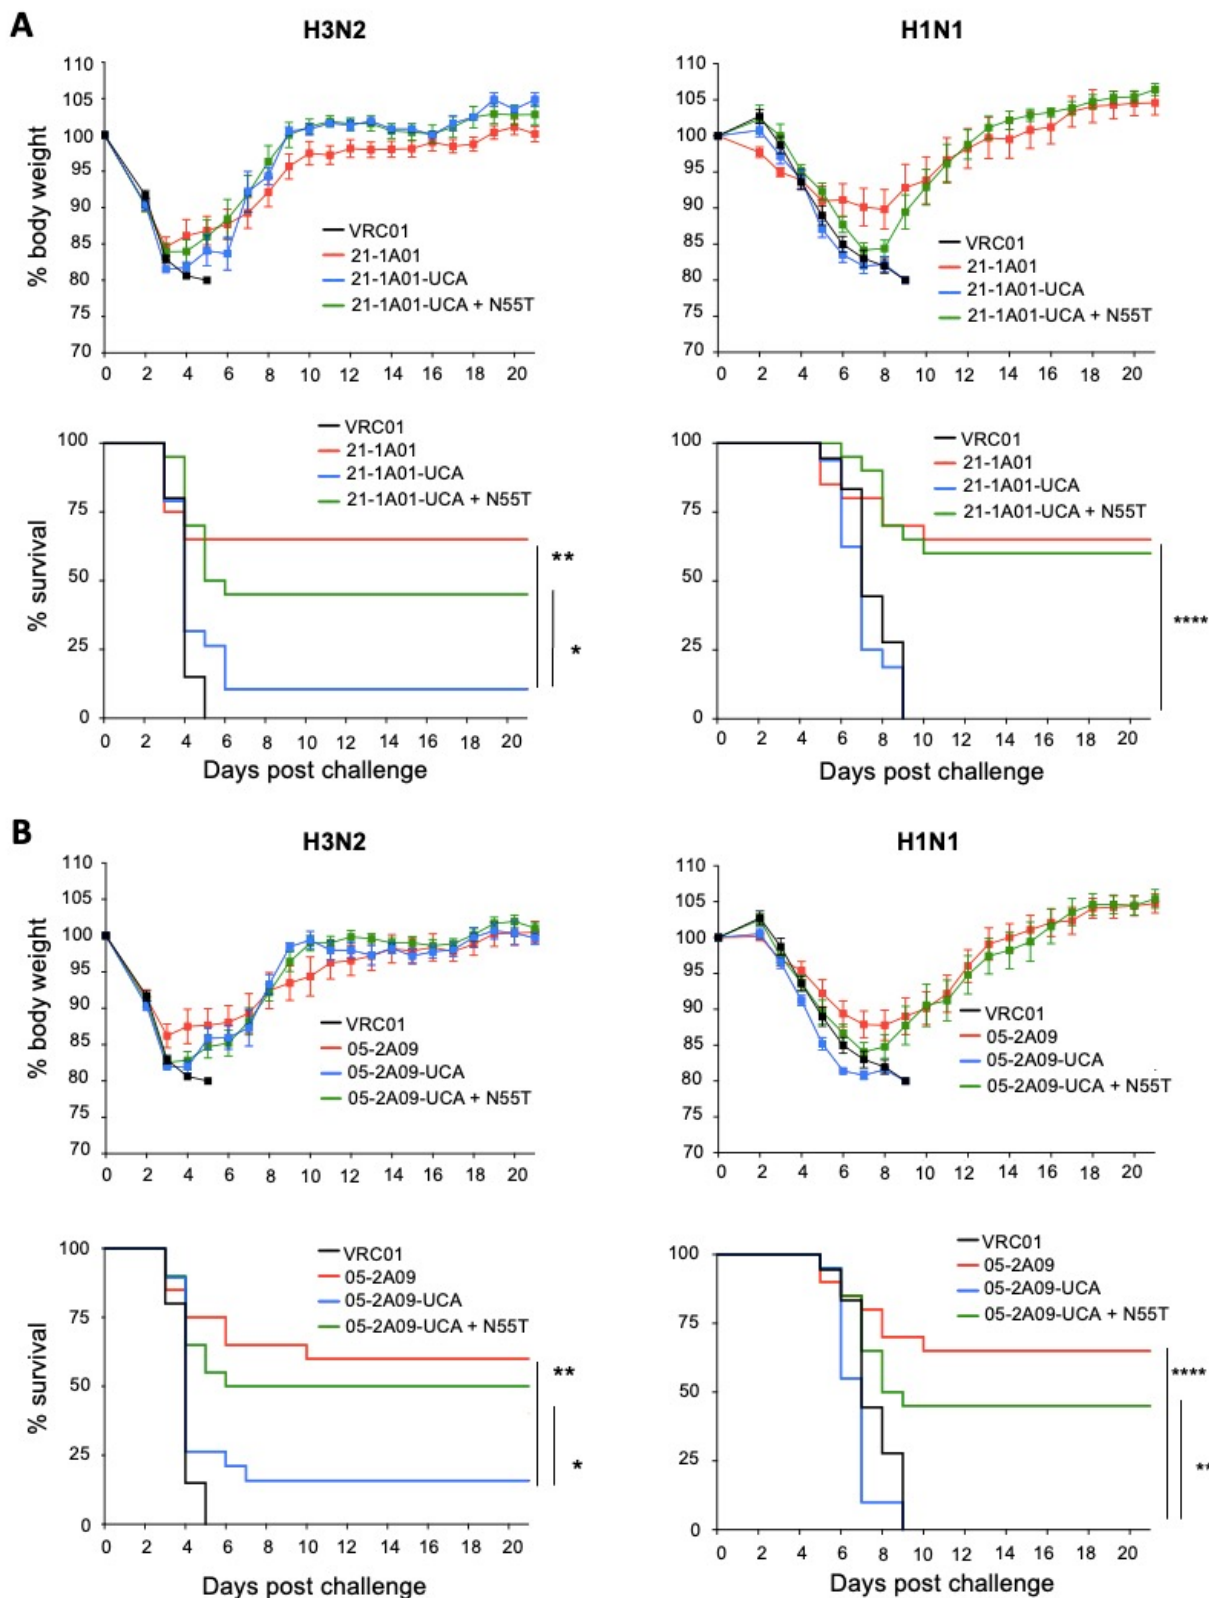

**Figure S6. N55T enables cross-group protection by multiple members of the VH1-18 QxxV bnAb class (related to Figure 6A-D).** (A) Weight loss and survival from lethal H3N2 virus challenge ( $10^8$  TCID<sub>50</sub>/ml X-31) and H1N1 virus challenge [ $10^4$  TCID<sub>50</sub>/ml maA/Cal/09 (Fink *et al.*, 2018; Ursin *et al.*, 2022)] following passive transfer of 5 mg/kg 21-1A01-UCA, 21-1A01-UCA + N55T, 21-1A01, or VRC01 as the isotype control [n=20 mice per group, \*\*\*\*P<0.0001, \*\*P<0.01, \*P<0.05 (Mantel-Cox test of survivorship); one experiment]. (B) Weight loss and survival from lethal H3N2 virus challenge ( $10^8$  TCID<sub>50</sub>/ml X-31) and H1N1 virus challenge ( $10^4$  TCID<sub>50</sub>/ml maA/Cal/09) following passive transfer of 5 mg/kg 05-2A09-UCA, 05-2A09-UCA + N55T, 05-2A09, or VRC01 as the isotype control [n=20 mice per group, \*\*\*\*P<0.0001, \*\*\*P<0.001, \*\*P<0.01, \*P<0.05 (Mantel-Cox test of survivorship); one experiment].

**Table S1.** CryoEM data collection, processing and model building statistics, related to Figure 1,5,7 and S1.

| Map                                          | Perth09H3+UCA6<br>FAB | Perth09H3 +<br>H3D15 pFab | Perth09H3 +<br>H3D28 pFab | Shanghai13H7 +<br>H7D15 pFab | Shanghai13H7 +<br>H7D28 pFab | Mich15H1 +<br>091B12 Fab | Mich15H1 +<br>UCA_N55T Fab |
|----------------------------------------------|-----------------------|---------------------------|---------------------------|------------------------------|------------------------------|--------------------------|----------------------------|
| EMDB                                         | EMD-42528             | EMD-42531                 | EMD-42532                 | EMD-42533                    | EMD-42534                    | EMD-42529                | EMD-42530                  |
| <i>Data collection</i>                       |                       |                           |                           |                              |                              |                          |                            |
| Microscope                                   | TFS Glacios           |                           |                           |                              |                              |                          |                            |
| Voltage (kV)                                 | 200                   |                           |                           |                              |                              |                          |                            |
| Detector                                     | TFS Falcon 4          |                           |                           |                              |                              |                          |                            |
| Recording mode                               | Counting              |                           |                           |                              |                              |                          |                            |
| Nominal magnification                        | 190,000x              |                           |                           |                              |                              |                          |                            |
| Movie micrograph pixelsize (Å)               | 0.725                 |                           |                           |                              |                              |                          |                            |
| Number of frames (Falcon 4 EER<br>fractions) | 40                    |                           |                           |                              |                              |                          |                            |
| Total dose (e <sup>-</sup> /Å <sup>2</sup> ) | 50.21                 | 50.36                     | 50.36                     | 49.19                        | 46.87                        | 49.19                    | 49.22                      |
| Defocus range (µm)                           | -0.7 to -1.5          |                           |                           |                              |                              |                          |                            |
| <i>EM data processing</i>                    |                       |                           |                           |                              |                              |                          |                            |
| Number of movie micrographs                  | 5,565                 | 4,457                     | 4,238                     | 4,553                        | 8,990                        | 4,766                    | 4,805                      |
| Particles used for reconstruction            | 469,712               | 382,032                   | 477,373                   | 167,583                      | 183,753                      | 89,540                   | 77,014                     |
| Symmetry                                     | C1                    |                           |                           |                              |                              |                          |                            |
| Map pixel size                               | 0.725                 |                           |                           |                              |                              |                          |                            |
| Map resolution (FSC 0.143; Å)                | 2.8                   | 2.8                       | 2.7                       | 3.2                          | 3.3                          | 3.3                      | 3.5                        |
| Map sharpening B-factor (Å <sup>2</sup> )    | -72.9                 | -77.1                     | -76.7                     | -92.3                        | -92.7                        | -73.4                    | -86.6                      |
| <i>Structure building and validation</i>     |                       |                           |                           |                              |                              |                          |                            |
| <i>Composition</i>                           |                       |                           |                           |                              |                              |                          |                            |
| Atoms                                        | 13696                 | 13046                     | 13046                     | 12707                        | 13329                        | 13663                    | 13615                      |
| Residues (protein)                           | 1690                  | 1693                      | 1693                      | 1684                         | 1684                         | 1694                     | 1693                       |
| Residues (ligands)                           | NAG:27                | NAG: 24                   | NAG: 24                   | NAG:15                       | NAG:15                       | NAG:18                   | NAG:17                     |
| MolProbity score                             | 1.05                  | 1.32                      | 1.25                      | 1.38                         | 1.34                         | 1.32                     | 1.15                       |
| Clashscore                                   | 2.34                  | 3.58                      | 3.38                      | 3.81                         | 4.21                         | 2.83                     | 3.59                       |
| Map correlation coefficient (mask)           | 0.84                  | 0.79                      | 0.84                      | 0.76                         | 0.78                         | 0.80                     | 0.81                       |
| <i>EMRinger score</i>                        |                       |                           |                           |                              |                              |                          |                            |
| d FSC model (0.5; Å)                         | 2.9                   | 3.0                       | 2.9                       | 3.6                          | 3.5                          | 3.6                      | 3.9                        |
| <i>RMSD from ideal</i>                       |                       |                           |                           |                              |                              |                          |                            |
| Bond length (Å)                              | 0.005                 | 0.005                     | 0.006                     | 0.006                        | 0.006                        | 0.006                    | 0.007                      |
| Bond angles (°)                              | 0.966                 | 0.901                     | 1.061                     | 1.120                        | 1.083                        | 1.073                    | 1.104                      |
| <i>Ramachandran plot</i>                     |                       |                           |                           |                              |                              |                          |                            |
| Favored (%)                                  | 97.85                 | 97.02                     | 97.38                     | 96.70                        | 97.30                        | 96.31                    | 98.03                      |
| Allowed (%)                                  | 2.15                  | 2.98                      | 2.62                      | 3.30                         | 2.70                         | 3.69                     | 1.97                       |
| Outliers (%)                                 | 0                     | 0                         | 0                         | 0                            | 0                            | 0                        | 0                          |
| Side chain rotamer outliers (%)              | 0                     | 0                         | 0                         | 0                            | 0                            | 0.07                     | 0                          |
| Cβ outliers (%)                              | 0                     | 0                         | 0                         | 0                            | 0                            | 0                        | 0                          |
| PDB                                          | 8UT3                  | 8UT6                      | 8UT7                      | 8UT8                         | 8UT9                         | 8UT4                     | 8UT5                       |

**Table S2.** Crystallographic statistics of 09-1B12 Fab bound to H3 HA A/Perth/16/2009, related to Figures 1, 4 and 7

| 09-1B12 Fab bound to H3 HA A/Perth/16/2009             |                              |
|--------------------------------------------------------|------------------------------|
| Data Collection                                        |                              |
| Resolution (Å)                                         | 50.21 - 4.02                 |
| Wavelength (Å)                                         | 0.97918                      |
| Space Group                                            | P 3 <sub>1</sub> 21          |
| Unit cell dimensions (a, b, c) (Å)                     | 158.04, 158.04, 417.206      |
| Unit cell angles ( $\alpha$ , $\beta$ , $\gamma$ ) (°) | 90, 90, 120                  |
| I/ $\sigma$                                            | 7.00 (1.67)                  |
| $R_{\text{meas}}$ (%)                                  | 0.5988 (2.305)               |
| CC <sub>1/2</sub> (%)                                  | 99.5 (65.4)                  |
| Completeness (%)                                       | 99.69 (98.07)                |
| Number of observed reflections                         | 1045911 (93567)              |
| Number of unique reflections                           | 51070 (4940)                 |
| Redundancy                                             | 20.5 (18.9)                  |
| Refinement                                             |                              |
| Resolution (Å)                                         | 50.21 - 4.02 (4.164 - 4.021) |
| Reflections used in refinement                         | 51049 (4939)                 |
| Reflections used for $R_{\text{free}}$                 | 2003 (194)                   |
| $R_{\text{work}}$ (%)                                  | 22.98 (29.93)                |
| $R_{\text{free}}$ (%)                                  | 25.44 (33.87)                |
| Ramachandran favored/allowed (%)                       | 95.44 / 4.34                 |
| Ramachandran outliers (%)                              | 0.22                         |
| Rmsd bond lengths (Å)                                  | 0.005                        |
| Rmsd bond angles (°)                                   | 0.73                         |
| Average B-factor                                       | 113.41                       |
| PDB ID                                                 | 8UWA                         |



**Table S3:** Binding constants ( $K_D$ ) for UCA-inferred VH1-18 QxxV  $\pm$  N55T Fabs to group 1 and 2 IAV HAs (H1 = A/Michigan/45/2015, pdmH1 = A/California/07/2009, H5 = A/Indonesia/05/2005, H3 = A/Perth/16/2009; H7 = A/Shanghai/02/2013). Related to Figures 1, 6 and S6.

| Fab                 | Antigen (HA) | $K_D$ (M)   | $K_a$ (M <sup>-1</sup> s <sup>-1</sup> ) | $K_a$ Error | $K_d$ (s <sup>-1</sup> ) | $K_d$ Error |
|---------------------|--------------|-------------|------------------------------------------|-------------|--------------------------|-------------|
| 09-1B12-UCA         | H1           | 0.0004363.3 | 2.91E+03                                 | 1.41E+05    | 1.27E+00                 | 4.92E-01    |
|                     | pdmH1        | 8.58E-04    | 2.54E+02                                 | 8.18E+03    | 2.18E-01                 | 2.24E-02    |
|                     | H5           | 3.28E-03    | 6.45E+01                                 | 7.47E+03    | 2.12E-01                 | 1.32E-02    |
|                     | H3           | 1.24E-07    | 2.10E+04                                 | 2.18E+02    | 2.60E-03                 | 4.01E-05    |
|                     | H7           | 2.68E-06    | 1.21E+04                                 | 9.55E+01    | 3.26E-02                 | 8.80E-05    |
| 05-2A09-UCA         | H1           | 1.60E-03    | 1.33E+02                                 | 3.92E+03    | 2.12E-01                 | 1.30E-02    |
|                     | pdmH1        | 2.00E-05    | 6.87E+03                                 | 8.40E+02    | 1.37E-01                 | 1.88E-03    |
|                     | H5           | 6.11E-04    | 6.35E+02                                 | 2.64E+04    | 3.87E-01                 | 5.65E-02    |
|                     | H3           | 6.66E-07    | 6.77E+04                                 | 5.73E+02    | 4.51E-02                 | 1.92E-04    |
|                     | H7           | 3.73E-06    | 9.94E+03                                 | 8.89E+02    | 3.71E-02                 | 8.81E-04    |
| 05-2D04-UCA         | H1           | 8.42E-05    | 3.63E+03                                 | 2.29E+03    | 3.05E-01                 | 6.17E-03    |
|                     | pdmH1        | 2.12E-03    | 4.89E+01                                 | 4.67E+02    | 1.04E-02                 | 1.08E-03    |
|                     | H5           | 2.58E-02    | 8.08E+00                                 | 7.50E+03    | 2.06E-01                 | 1.85E-02    |
|                     | H3           | 2.19E-08    | 2.72E+04                                 | 1.47E+02    | 5.96E-04                 | 9.46E-06    |
|                     | H7           | 4.10E-07    | 4.01E+03                                 | 9.53E+00    | 1.64E-03                 | 6.00E-06    |
| a06-1F04-UCA        | H1           | 1.42E-04    | 1.05E+03                                 | 6.95E+02    | 1.49E-01                 | 1.67E-03    |
|                     | pdmH1        | 1.67E-03    | 1.53E+02                                 | 6.12E+03    | 2.51E-01                 | 1.58E-02    |
|                     | H5           | 7.05E-05    | 5.68E+03                                 | 2.31E+04    | 4.00E-01                 | 5.23E-02    |
|                     | H3           | 2.61E-08    | 2.73E+04                                 | 1.10E+02    | 7.13E-04                 | 7.62E-06    |
|                     | H7           | 1.86E-07    | 8.47E+03                                 | 4.64E+01    | 1.57E-03                 | 1.67E-05    |
| 21-1A01-UCA         | H1           | 3.60E-05    | 1.12E+04                                 | 3.76E+03    | 4.02E-01                 | 9.78E-03    |
|                     | pdmH1        | 9.34E-05    | 3.39E+03                                 | 1.26E+04    | 3.17E-01                 | 2.34E-02    |
|                     | H5           | 4.61E-06    | 4.85E+04                                 | 1.42E+03    | 2.24E-01                 | 2.26E-03    |
|                     | H3           | 1.39E-08    | 6.03E+04                                 | 1.75E+02    | 8.42E-04                 | 5.02E-06    |
|                     | H7           | 9.81E-08    | 4.94E+04                                 | 2.04E+02    | 4.84E-03                 | 2.92E-05    |
| 27-1D08-UCA         | H1           | 8.12E-04    | 4.01E+02                                 | 6.13E+03    | 3.26E-01                 | 1.61E-02    |
|                     | pdmH1        | 5.30E-05    | 1.98E+03                                 | 5.32E+03    | 1.05E-01                 | 6.37E-03    |
|                     | H5           | 6.96E-03    | 4.11E+01                                 | 3.97E+04    | 2.86E-01                 | 9.30E-02    |
|                     | H3           | 5.45E-07    | 1.19E-04                                 | 2.33E+01    | 6.47E-03                 | 1.19E-05    |
|                     | H7           | 4.24E-06    | 1.05E+04                                 | 5.25E+02    | 4.45E-02                 | 7.27E-04    |
| 09-1B12-UCA + N55T  | H1           | 8.26E-06    | 1.53E+04                                 | 8.66E+02    | 1.26E-01                 | 1.73E-03    |
|                     | pdmH1        | 1.96E-06    | 7.52E+04                                 | 3.41E+03    | 1.43E-01                 | 2.96E-03    |
|                     | H5           | 1.27E-05    | 1.51E+04                                 | 1.27E+03    | 1.91E-01                 | 2.77E-03    |
|                     | H3           | 7.43E-08    | 6.20E+03                                 | 1.31E+01    | 4.61E-04                 | 5.59E-06    |
|                     | H7           | 6.53E-07    | 5.44E+03                                 | 9.69E+01    | 3.55E-03                 | 4.91E-05    |
| 05-2A09-UCA + N55T  | H1           | 1.83E-05    | 1.68E+04                                 | 2.65E+03    | 3.06E-01                 | 5.70E-03    |
|                     | pdmH1        | 5.91E-07    | 2.88E+05                                 | 1.51E+04    | 1.72E-01                 | 4.11E-03    |
|                     | H5           | 1.98E-06    | 5.23E+04                                 | 8.90E+02    | 1.04E-01                 | 5.58E-04    |
|                     | H3           | 2.25E-07    | 5.52E+04                                 | 2.52E+02    | 1.24E-02                 | 4.24E-05    |
|                     | H7           | 3.94E-07    | 3.74E+04                                 | 1.41E-02    | 1.47E-02                 | 3.77E-05    |
| 05-2D04-UCA + N55T  | H1           | 5.02E-05    | 2.76E+03                                 | 2.30E+02    | 1.39E-01                 | 5.77E-04    |
|                     | pdmH1        | 7.60E-06    | 1.50E+04                                 | 6.38E+02    | 1.14E-01                 | 1.16E-03    |
|                     | H5           | 4.07E-06    | 8.39E+03                                 | 2.01E+02    | 3.41E-02                 | 2.48E-04    |
|                     | H3           | 8.32E-09    | 2.14E+04                                 | 9.58E+01    | 1.81E-04                 | 1.19E-05    |
|                     | H7           | 5.69E-08    | 1.12E+04                                 | 2.66E+01    | 6.37E-04                 | 6.77E-06    |
| a06-1F04-UCA + N55T | H1           | 1.96E-06    | 6.98E+04                                 | 7.31E+02    | 1.37E-01                 | 4.99E-04    |
|                     | pdmH1        | 1.44E-06    | 9.14E+04                                 | 1.15E+03    | 1.40E-01                 | 4.71E-04    |
|                     | H5           | 4.91E-06    | 1.03E+05                                 | 2.55E+04    | 5.06E-01                 | 3.91E-01    |
|                     | H3           | 3.24E-08    | 2.32E+04                                 | 1.50E+02    | 7.55E-04                 | 1.33E-05    |
|                     | H7           | 2.93E-07    | 4.39E+04                                 | 4.69E+03    | 5.76E-01                 | 1.08E-02    |
| 21-1A01-UCA + N55T  | H1           | 6.87E-06    | 2.53E+04                                 | 4.57E+02    | 1.74E-01                 | 7.81E-04    |
|                     | pdmH1        | 4.78E-06    | 4.93E+04                                 | 1.61E+03    | 2.36E-01                 | 2.47E-03    |
|                     | H5           | 2.51E-06    | 6.16E+04                                 | 2.04E+03    | 1.55E-01                 | 1.75E-03    |
|                     | H3           | 2.09E-08    | 1.79E+04                                 | 3.63E+01    | 3.75E-04                 | 5.40E-06    |
|                     | H7           | 2.57E-08    | 1.52E+04                                 | 3.89E+01    | 3.89E-04                 | 7.01E-06    |
| 27-1D08-UCA + N55T  | H1           | 1.17E-06    | 6.45E+04                                 | 2.64E+03    | 7.52E-02                 | 1.18E-03    |
|                     | pdmH1        | 4.87E-06    | 2.21E+04                                 | 1.75E+03    | 1.08E-01                 | 1.63E-03    |
|                     | H5           | 9.52E-06    | 1.21E+06                                 | 2.09E+03    | 1.16E-01                 | 2.47E-03    |
|                     | H3           | 4.25E-07    | 3.82E+03                                 | 6.17E+01    | 1.62E-03                 | 1.97E-05    |
|                     | H7           | 6.77E-07    | 6.95E+04                                 | 2.40E+03    | 4.70E-02                 | 1.01E-03    |

**Table S5.** Primers for single cell BCR sequencing, related to STAR Methods

| Primer        | Sequence                                                         |
|---------------|------------------------------------------------------------------|
|               | Single cell forward                                              |
| P7_09-1B12_HC | GTCTCGTGGGCTCGGAGATGTGTATAAGAGACAGGTCAGCTGGTGCAGTCTGG            |
| P7_09-1B12_LC | GTCTCGTGGGCTCGGAGATGTGTATAAGAGACAGTGTGTTGACGCAGTCTCCAGG          |
|               | Single cell reverse                                              |
| P5_09-1B12_HC | TCGTCGGCAGCGTCAGATGTGTATAAGAGACAGCCAGACGTCCATAGTGTAGTAGT<br>AGGA |
| P5_09-1B12_LC | TCGTCGGCAGCGTCAGATGTGTATAAGAGACAGCCTGGCCAAAAGTCCACCGA            |
